1       **NON-TARGETED METABOLOMICS REVEAL DIFFERENCES IN THE METABOLIC PROFILE**  
2       **OF THE FALL ARMYWORM STRAINS WHEN FEEDING DIFFERENT FOOD SOURCES**

3

4                   <sup>1</sup>Nathalia C. Oliveira, <sup>2</sup>Larry Phelan, <sup>3</sup>Carlos A. Labate, <sup>1</sup>Fernando L. Cônsoli

5

6       <sup>1</sup>Insect Interactions Laboratory, Department of Entomology and Acarology, Luiz de Queiroz College of Agriculture,  
7 University of São Paulo, Piracicaba, São Paulo, Brazil

8       <sup>2</sup>Department of Entomology, OARDC, The Ohio State University, Wooster, Ohio, EUA

9       <sup>3</sup>Multi-User Proteomics, Metabolomics and Lipidomics Laboratory, Department of Genetics, Luiz de Queiroz  
10 College of Agriculture, University of São Paulo, Piracicaba, São Paulo, Brazil

11

12       **Correspondence**

13       Fernando L. Cônsoli, Insect Interactions Laboratory, Department of Entomology and Acarology, Luiz de  
14 Queiroz College of Agriculture, University of São Paulo, Piracicaba, São Paulo, Brazil.

15       E-mail: [fconsoli@usp.br](mailto:fconsoli@usp.br)

16

17       **ABSTRACT**

18       *Spodoptera frugiperda*, the fall armyworm (FAW), is an important polyphagous agricultural pest feeding  
19 on nearly 350 host plants. FAW is undergoing incipient speciation with two well-characterized host-adapted  
20 strains, the "corn" (*CS*) and "rice" (*RS*) strains, which are morphologically identical but carry several genes  
21 under positive selection for host adaptation. We used non-targeted metabolomics based on gas  
22 chromatography/mass spectrometry to identify differences in metabolite profiles of the larval gut of *CS* and  
23 *RS* feeding on different host plants. Larvae were fed on artificial diet, maize, rice, or cotton leaves from  
24 eclosion to the sixth instar, when they had their midgut dissected for the analysis. This study revealed that  
25 the midgut metabolome of FAW varied due to larval diet and differed between the FAW host-adapted  
26 strains. Additionally, we identified several candidate metabolites that may be involved in the adaptation of

27 CS and RS to their host plants. Our findings provide clues toward the gut metabolic activities of the FAW  
28 strains.

29

30 **KEY WORDS:**

31 Metabolite, herbivore, insect-plant interaction, nutritional ecology, *Spodoptera frugiperda*

32

33 **1. INTRODUCTION**

34 *Spodoptera frugiperda*, the fall armyworm (FAW) (Lepidoptera, Noctuidae), feeds on approximately 350  
35 different species from 76 families (Montezano et al., 2018). Despite this wide range of host plants, FAW is  
36 best known as one of the most important agricultural pests of grasses (maize, millet, rice and sorghum) and  
37 some cultivated dicots such as cotton (Barros et al., 2010). The FAW is native to the New World, but in the  
38 last few years has invaded Africa and further spread to Asia and Oceania (Goergen et al., 2016; Johnson,  
39 1987; Otim et al., 2018; Piggott et al., 2021; Suby et al., 2020), Therefore, FAW is currently considered of  
40 a global concern due its polyphagy and capacity for rapid evolution of resistance to pesticides and Bt crops  
41 (Huang, 2021; Jakka et al., 2016), representing an imminent threat to food security and a source of  
42 significant economic losses.

43 The FAW is the only species of *Spodoptera* that usually feeds on grasses without having adapted, suitable  
44 mandibles. Larvae that feed on grasses typically have specialized mandibles with chisel-like edges adapted  
45 to the consumption of silica-rich leaves, which cause wear to larval mandibles(Djain and Pathak, 1967;  
46 Pogue, 2002; Smith, 2005). Mandibles of the FAW have serrate-like processes adapted to the consumption  
47 of dicots or monocots that do not accumulate silica (Pogue, 2002). FAW is primitively polyphagous, but  
48 because of the mandible-type it is thought to have started exploiting cultivated grasses as host plants only  
49 recently (Kergoat et al., 2021, 2012).

50 Another interesting aspect of the FAW is the identification of two distinct strains known as the rice (RS)  
51 and corn (CS) strains (Gouin et al., 2017; Pashley, 1986). There are indications that this divergence occurred  
52 about 2 Myr ago (Kergoat et al., 2021, 2012).These strains differ in their performance and preference for

53 host plants, and the correct classification of these two strains of the FAW is still controversial. Some authors  
54 refer to them as “sibling species” (Drès and Mallet, 2002; Dumas et al., 2015), “host strains” (Pashley,  
55 1986; Prowell et al., 2004), “host form” (Juárez et al., 2014) and “morphocryptic strains” (Sarr et al., 2021).

56 The lack of consensus is due to the fact these strains co-exist in sympatry and still hybridize, but also due  
57 to inconsistencies in the associations with the named host plants. At the adult stage, both corn and rice  
58 strains showed weak evidence of preference for their expected host plant in choice and non-choice  
59 laboratory experiments (Orsucci et al. 2020). Despite the fact that the corn strain is often associated with  
60 maize, sorghum, and cotton, with the rice strain associated with rice and pasture grasses, some reports show  
61 the rice strain larvae developed better on corn and sorghum than corn strain larvae (Meagher et al. 2004).  
62 Moreover, both strains performed poorly when feeding on rice (Silva-Brandão et al. 2017). Therefore,  
63 further studies are still needed to understand how the process of host-plant adaptation is taking place in  
64 FAW.

65 Every novel acquisition of host plant by herbivores constitutes a new niche adaptation program that opens  
66 several evolutionary possibilities, but not without associated costs. In order to exploit a novel host, insects  
67 have to become adapted to deal with new defensive secondary metabolites, such as phenolics and  
68 terpenoids, and the nutritional quality of the new host plant (Singer, 2008). However, the mechanisms  
69 behind the best performance of a given host-adapted strain on a given plant are poorly understood so far.  
70 Different approaches can be used to address this question. One alternative is to access the insect  
71 metabolome, the set of all low-molecular-weight metabolites that are produced during cell metabolism (Sun  
72 and Hu, 2016). Ultimately, the metabolome is a product of genomic, transcriptomic, and/or proteomic  
73 processes (Johnson and Gonzalez 2012). Non-targeted metabolomics provides a holistic view of the insect  
74 metabolic profile. It makes no assumptions about which metabolites are important in distinguishing sample  
75 types (Sévin et al., 2015). This approach provides a direct functional measurement of cellular activity and  
76 physiological state, reflecting environmental changes such as new host plants as well as aspects related to  
77 their genome, as different host-adapted strains. Therefore, the non-targeted study of metabolomes is a good  
78 tool to highlight candidate metabolites involved in insect-plant interactions (Maag et al., 2015). Particularly,

79 the assessment of the insect midgut may be useful, bearing in mind that it is a selectively permeable and  
80 metabolically active tissue, in which most digestion and almost all nutrient absorption takes place (Dow,  
81 1987). However, approaches focused on the assessment of the gut metabolomics of insect herbivores are  
82 not common, and little is known on how host plants impact the metabolic profile of the herbivore gut.

83 The gut microbiome is also a key player in th  
84 e metabolic processes of their hosts. Gut microbes can play important roles in several metabolic functions,  
85 including vitamin production (Chen et al., 2016; Salem et al., 2014), amino acid synthesis (Ayayee et al.,  
86 2016; Xia et al., 2017) and detoxification of secondary plant compounds and synthetic insecticides  
87 (Almeida et al., 2017; Ceja-Navarro et al., 2015). Among the numerous factors that influence the gut  
88 microbiota (R J Dillon and Dillon, 2004; Yun et al., 2014), diet has received considerable attention due to  
89 its strong effect on the composition of the microbial community (Mason et al., 2020; Wongsiri and  
90 Randolph, 1962; Yun et al., 2014). Diet provides the substrates to produce a plethora of small molecules  
91 that can be converted by the gut microbiota, and which are not produced by the host (Krishnan et al., 2015;  
92 Wang et al., 2020). Therefore, the gut microbiota may also facilitate adaptation to new host plants by  
93 regulating or participating in the host's metabolic processes (Hammer and Bowers, 2015; Zhang et al.,  
94 2020). Microbial contribution will depend on substrate availability and on microbial gene diversity and  
95 activity (Wu et al., 2016). Thus, taxonomic or metagenomic information of the gut microbiota is limited in  
96 predicting the metabolome of a microbial community, as it may under- or overestimate the functional  
97 contribution of associated gut microbiota depending on the nutritional conditions the host is exposed to  
98 (Wu et al., 2016).

99 The FAW is a good model to study adaptation of phytophagous insects to agricultural plants. Moreover,  
100 the metabolic processes underlying host shifts or differentiation in this species are not well understood. In  
101 terms of metabolome, we would expect different metabolic profiles to reflect new adaptations. We predict  
102 differences in larval adaptation to host plants to be reflected in the metabolome of their gut. These  
103 differences might highlight adaptations in response to plant chemistry, changes in metabolic pathways,  
104 and/or new roles for microbial symbionts. The aim of the present research is to investigate if the gut

105 metabolome of FAW is determined by the diet and/or by host genotype. Highlighting the metabolic  
106 differences in the midgut of the FAW strains may represent the starting point for future research that aims  
107 to clarify : 1) how different host plants affect insect nutritional metabolism and 2) how larvae of the two  
108 host strains differ in their metabolism of different host plant chemistries.

109

## 110 **2. MATERIAL AND METHODS**

### 111 **2.1 Insect rearing and strains identification**

112 Colonies of FAW were initiated in the laboratory from field-collected populations. The *RS* was  
113 originally obtained from rice fields in Santa Maria, RS, Brazil (29°68'68"S, 53°81'49"W) and the *CS* from  
114 a maize field in Piracicaba, SP, Brazil (22°43'30"S, 47°38'56"O). Field-collected larvae were  
115 individualized into plastic cups containing an artificial diet based on wheat germ, beans and brewer's yeast  
116 (Burton and Perkins, 1972; Kasten Jr et al., 1978), brought to the laboratory and reared under controlled  
117 conditions ( $25 \pm 1^\circ\text{C}$ ;  $70 \pm 10\%$  RH; 14 h photophase) until pupation. Pupae were transferred to clean  
118 plastic cups lined with filter paper for adult emergence. The produced exuviae were used for DNA  
119 extraction for strain identification as described below. After strain identification, all newly emerged adults  
120 belonging to the same strain were transferred to PVC tubes lined with paper as a substrate for egg laying.  
121 Egg masses were collected and transferred to artificial diet for later larval development.

122 Strain identification followed Levy et al. (2002) (Levy et al., 2002). DNA was extracted from individual  
123 pupal exuviae using the genomic DNA preparation protocol from RNAlater™ preserved tissues with some  
124 modifications. The exuviae were individually placed in 750  $\mu\text{L}$  digestion buffer (60 mM Tris pH 8.0, 100  
125 mM EDTA, 0.5% SDS) containing proteinase K at a final concentration of 500  $\mu\text{g}/\text{mL}$ . Samples were  
126 macerated using plastic pestles and mixed well by inversion. Samples were incubated overnight at 55°C.  
127 Afterwards, 750  $\mu\text{L}$  of phenol: chloroform (1:1) was added and samples were rapidly inverted for 2 min  
128 before centrifugation at a tabletop centrifuge at maximum speed (10 min). The aqueous layer was  
129 recovered and subjected to re-extraction twice before a final extraction with chloroform. The aqueous

130 layer was collected and added to 0.1 volume of 3 M sodium acetate (pH 5.2) and an equal volume of 95%  
131 ethanol. Samples were then mixed by inversion, incubated for 40 min at -80°C, and centrifuged (27,238 g  
132 x 30 min x 4°C). The pellet obtained was washed twice with 1 mL of 85% ice-cold ethanol, centrifuged  
133 for 10 min after each wash and dried at 60°C during 5-10 min in a SpeedVac. Finally, the pellet obtained  
134 was resuspended in nuclease-free water. DNA concentration and quality were estimated by  
135 spectrophotometry and agarose gel electrophoresis (Sambrook and Russell, 2001).

136 Polymerase chain reaction (PCR) amplification of the mitochondrial COI gene was conducted using the  
137 primers set JM76 (5'-GAGCTGAATTAGGRACCTCCAGG-3') and JM77 (5'-  
138 ATCACCTCCWCCTGCAGGATC-3') to produce an amplicon of 569 base pairs (bp)(Levy et al. 2002).  
139 The PCR mixture contained 100-150 ng of gDNA, 1.5 mM of MgCl<sub>2</sub>, 1 x PCR buffer, 0.2 mM of each  
140 dNTP, 0.32 μM of each primer and 0.5U of GoTaq® DNA Polymerase (Promega) in a total volume of 25  
141 μL. The thermocycling conditions were one cycle at 94°C x 1 min followed by 33 cycles at 92°C x 45 s,  
142 56°C x 45 s, 72°C x 1 min, with a final extension at 72°C x 3 min (1x). Amplicons were then subjected to  
143 endonuclease restriction analysis using *MspI* (HpaII) to produce two fragments (497pb and 72pb) for  
144 amplicons of the *CS*, while no digestion is observed for *RS* amplicons. After the amplification, 10 μL of  
145 the PCR reaction mixture was subjected to digestion with 10 U of *MspI* following the manufacture  
146 guidelines (product number ER0541®, Thermo Scientific). Samples were gently mixed, centrifuged for a  
147 few seconds and incubated overnight at 37°C. Subsequently, digestion efficiency and the resulting  
148 products were verified using a 1.5% agarose gel electrophoresis.

## 149 **2.2 Assay with natural diet and gut dissection**

150 Maize (*Zea mays*, family: Poaceae) var. "Conventional impact" and cotton (*Gossypium hirsutum*,  
151 family: Malvaceae) var. IAC FC2 seeds were seeded in 500 mL plastic pots filled with soil conditioner,  
152 while rice seeds (*Oriza sativa*, family: Poaceae) var. BRS Esmeralda were seeded in 1 L plastic pots. All  
153 plants were maintained in a greenhouse.

154 The leaves were cut and immersed in a container with distilled water for 30 minutes to maintain  
155 turgidity. Newly emerged larvae of *RS* and *CS* strains were placed in 25 mL plastic cups containing a 3-  
156 cm piece of the host plant leaf (cotton and maize - leaves from v3-v4 stages; rice - v11-13). The leaves  
157 were replaced with fresh ones according to the needs of each instar and were replaced every other day or  
158 earlier to avoid food shortages. Insects were kept under controlled laboratory conditions throughout the  
159 experiments ( $25 \pm 1^\circ\text{C}$ ;  $60 \pm 10\%$ ; 14-hour photophase).

160 The experimental groups were represented by larvae of rice (*RS*) and corn (*CS*) strains reared on the  
161 following substrates: rice (RiRS; RiCS), corn (CoRS; CoCS), cotton (CtRS; CtCS), and artificial diet  
162 (DiRS; DiCS). We used five replicates for each treatment, with each replicate corresponding to a pool of  
163 midgut collected from five larvae.

164 The guts were collected from sixth instars larvae, one day after the molting. Larvae were surface-  
165 sterilized in cooled 0.2% sodium hypochlorite in 70% ethanol and washed in cold sterile water. Surface-  
166 sterilized larvae were dissected in sterile water under aseptic conditions. Gut tissues with the peritrophic  
167 matrix and the enclosed intestinal content were flash-frozen in liquid nitrogen and stored at -80 until  
168 metabolite extraction.

### 169 **2.3 Metabolite extraction**

170 Samples were subjected to metabolite extraction and analysis according to (Hoffman et al., 2010), with  
171 some modifications. A pool of midguts from five larvae were macerated in liquid nitrogen, and 25 mg of  
172 the macerate was homogenized in TissueLyser II (QIAGEN) at the highest speed for 1 min using 5 mm  
173 tungsten beads in 500  $\mu\text{L}$  of methanol-chloroform-water solution (3:1:1). Then the sample was sonicated  
174 ( $60 \text{ Hz}\cdot\text{s}^{-1} \times 30 \text{ min}$ ) in an ice bath ( $4^\circ\text{C}$ ) and centrifuged ( $16,000 \text{ g} \times 10 \text{ min} \times 4^\circ\text{C}$ ). The supernatant was  
175 collected and filtered through a Luer Lock 0.22  $\mu\text{M}$  filter (Millex®, JBR6 103 03) directly into amber  
176 glass vials.

177 Aliquots (50  $\mu\text{L}$ ) of each sample were freeze-dried in a Terrone model LS 3000 lyophilizer, and  
178 subjected to derivatization with 30  $\mu\text{L}$  methoxyamine-HCl ( $20 \text{ mg}\cdot\text{mL}^{-1}$ ) in pyridine for 16 h at room  
179 temperature. Trimethylsilylation was accomplished with the addition of 1% trimethylchlorosilane

180 (TMCS) in 30  $\mu$ L of *n*-methyl-*n*-(trimethylsilyl)-trifluoroacetamide (MSTFA) to the samples, followed by  
181 incubation for 1 h at room temperature. After silylation, 30  $\mu$ L of heptane was added to samples, which  
182 were immediately analyzed in a random order in a 7890A Agilent Gas Chromatograph coupled to a  
183 Pegasus HT TOF Mass Spectrometer (LECO, St. Joseph, MI, USA) (GC-TOF/MS) (Technologies).  
184 Samples were injected together with mix of *n*-alkanes standards ( $C_{12}$  -  $C_{40}$ ) for the correct calculation of  
185 the retention times. Derivatized samples (1  $\mu$ L) were injected in splitless mode using an automatic  
186 sampler-CTC Combi Pal Xt Duo (CTC Analytics AG, Switzerland) coupled to the GC-MS system  
187 equipped with two silica columns in line. The first was a DB 5 column (20 m long x 0.18 mm internal  
188 diameter x 0.18  $\mu$ m thick) (Agilent J & W Scientific, Folsom, CA, USA), and the second a Rxi-17 column  
189 (0.84 m long x 0.1 mm internal diameter x 0.1  $\mu$ m thick) (Restek Corporation, Bellefonte, PA, USA). The  
190 injector was set at 280°C, the septum bleed rate was 20 mL.min<sup>-1</sup> and began after 250s from the start of  
191 data acquisition (Budzinski et al., 2019), The gas flow was 1 mL.min<sup>-1</sup>. The temperature of the first  
192 column was maintained at 80°C for 2 min and increased at 15°C.min<sup>-1</sup> to 305°C, with a 10 min hold. The  
193 temperature of the second column was maintained at 85°C for 2 min, and then raised to 310°C at  
194 15°C.min<sup>-1</sup>, with a 10 min hold. The column effluent was introduced into the ionization source of the  
195 Pegasus HT TOF MS. The transfer line and ionization source temperatures were held at 280 and 250°C,  
196 respectively. The ions were generated by an electron source (70-eV) at an ionization current of  
197 2.0 mA, and 20 spectra.s<sup>-1</sup> were acquired in a mass range of 45-800 *m/z*, with the detector voltage set to  
198 1500 V.

#### 199 **2.4 GC-TOF/MS data processing**

200 The processing of GC-TOF/MS data was performed in two steps. Initially the generated chromatograms  
201 were exported to the ChromaTOF program, version 4.32 Software (LECO, St. Joseph, MI, USA), in which  
202 base line correction, deconvolution of the spectra, retention rate correction (RI), retention time correction  
203 (RT), peak identification, and alignment and identification of metabolites were processed using the NIST  
204 library, version 11. Only metabolites with three or more characteristic masses and a score of 700 or higher



205 were considered valid. Isomers were manually checked and merged. Feature intensities were normalized  
206 to total ion chromatogram (TIC).

207 MetaboAnalyst 5.0 was used to perform all the downstream analyses (Chong et al., 2019). Data was *log*-  
208 transformed and scaled using Pareto. Hierarchical clustering was also performed with the *hclust* function  
209 in package *stat* (R v3.5.1) using Ward as a clustering algorithm and Euclidean distances as measures.  
210 Sample clustering was presented as a dendrogram. Principal Component Analysis (PCA) was performed in  
211 order to separate and classify the sample groups. Type 1 two-way ANOVA was used to examine the effects  
212 of strain and diet, and their interaction on metabolite abundance (Xia et al., 2011). False discovery rate was  
213 applied to adjust the *p*-values (0.05). Heatmap was built based only on the significant features from  
214 ANOVA. The distance measure used was the Euclidean, and Ward was used for clustering algorithm. In  
215 order to identify the features that were potentially significant in discriminating the strains on each host  
216 plant, pairwise analysis was performed using volcano plot, which combine fold change ( $FC \geq |2.0|$ ) and *t*-  
217 test analysis, that can control the false discovery rate ( $p \leq 0.05$ ).

218

### 219 **3. RESULTS**

220 The host plants on which FAW larvae fed significantly affected the midgut metabolome. The midgut  
221 metabolomes of *RS* and *CS* larvae also differed when feeding on the same diet. However, the food source  
222 had a greater impact shaping the gut metabolome of FAW than the host strain (show stats on which this is  
223 based, e.g., 2-way ANOVA of summed or overall effects). Metabolomic analyses led to the identification  
224 of two major clusters of metabolites, allowing the clear separation of larvae fed on artificial diet when  
225 compared to those fed on natural diets (Fig. 1A). The metabolomic profile obtained clearly separated FAW  
226 larvae fed on monocots (corn and rice) from those fed on the dicot cotton. Additionally, the profile of  
227 metabolites obtained for each FAW strain on each food source also led to their clear separation (Fig.1A).  
228 The PCA analysis explained a small percentage of the variation among the samples. The first two principal  
229 components explained 39.5% of the variation in the data and showed the clustering of the samples according  
230 to food source, but the separation based on strains was not as evident as shown in the dendrogram.

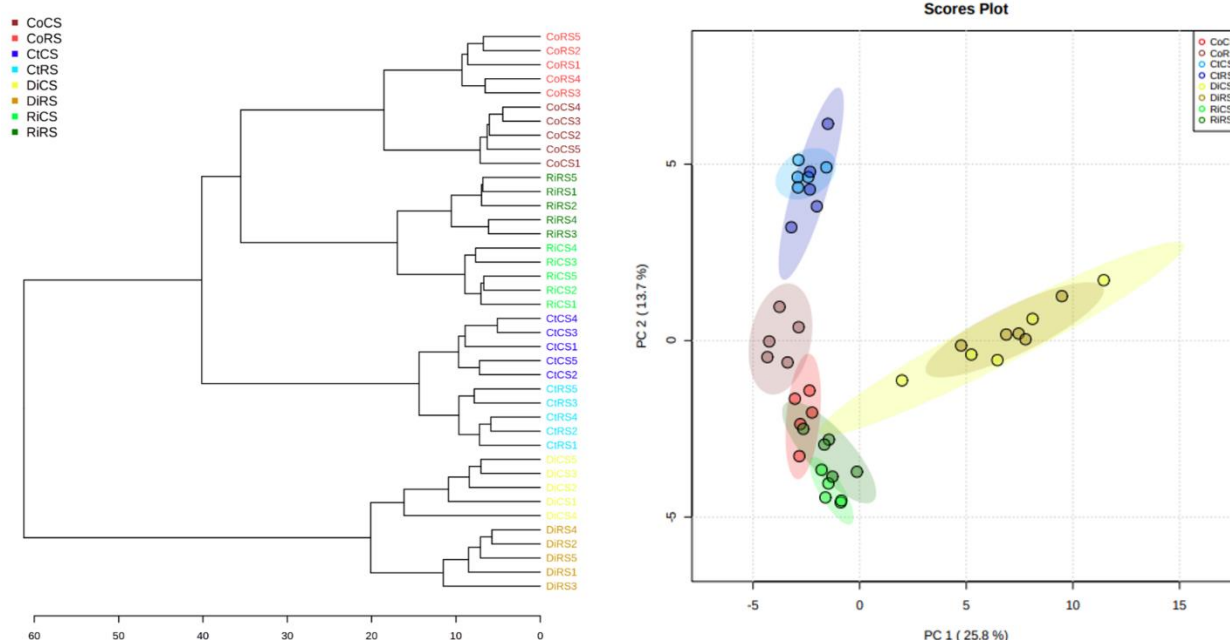

231

232 **Figure 1:** Clustering result shown as dendrogram with distance measure using Euclidean and clustering  
233 algorithm using ward.D of the midgut metabolite profiles of *S. frugiperda* larvae (A). Principal Component  
234 Analysis (PCA) Scores plot between the selected PCs. The explained variances are shown in brackets (B).  
235 The experimental groups were rice strain on rice (RiRS), corn (CoRS), cotton (CtRS) and artificial diet  
236 (DiRS) and corn strain on the same diets (RiCS, CoCS, CtCS and DiCS).

237

238 Among the 340 peaks identified in the gut samples of FAW larvae, 122 metabolites passed the filter  
239 criteria for analysis, with the abundance of 107 them being affected by the diet, 13 by the host-adapted  
240 strain, and 50 by the interaction of both factors (Table 1). The abundance of 12 metabolites was  
241 simultaneously affected by diet, strain, and their interactions (Fig. 2). The compounds were predominantly  
242 classified as amino acids, sugars, fatty acids, and organic acids.

243

Two-way ANOVA (between subjects)

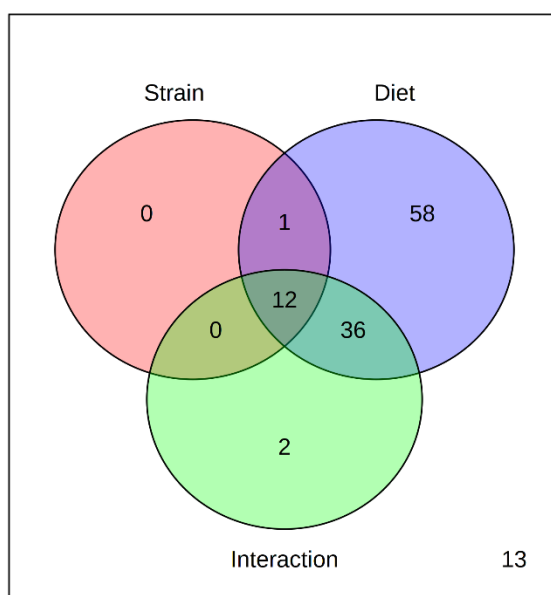

244  
245 **Figure 2:** Venn diagram showing the important features of the midgut metabolome of *S. frugiperda* larvae  
246 selected by two-way ANOVA whose levels were affected by strain, diet or interaction of strain and diet.  
247

248 **Table 1.** Significant features identified by two-way ANOVA. FDR's correction was applied to adjust the  
249 p-values.

| METABOLITE               | STRAIN |       | DIET   |       | INTERACTION |       |
|--------------------------|--------|-------|--------|-------|-------------|-------|
|                          | F.VAL  | ADJ.p | F.VAL  | ADJ.p | F.VAL       | ADJ.p |
| Homoserine               | 72.91  | <0.01 | 72.91  | <0.01 | 72.91       | <0.01 |
| Margaric acid            | 48.03  | <0.01 | 48.03  | <0.01 | 48.03       | <0.01 |
| 2-ketoglucose            | 46.17  | <0.01 | 19.54  | <0.01 | 19.54       | <0.01 |
| Shikimic acid            | 42.12  | <0.01 | 63.49  | <0.01 | 24.54       | <0.01 |
| Protocatechuic acid      | 30.70  | <0.01 | 112.80 | <0.01 | 13.37       | <0.01 |
| Glycerol monostearate    | 22.08  | <0.01 | 10.12  | <0.01 | 24.41       | <0.01 |
| D-Erythronolactone       | 20.78  | <0.01 | 7.28   | <0.01 | 7.28        | <0.01 |
| Benzoic acid             | 18.96  | <0.01 | 7.16   | <0.01 | 4.89        | 0.02  |
| Anthranilic acid         | 18.55  | <0.01 | 12.22  | <0.01 | 3.38        | 0.07  |
| 5-Hydroxynorvaline       | 15.64  | <0.01 | 15.64  | <0.01 | 15.64       | <0.01 |
| Glycerophosphoric acid   | 11.30  | 0.02  | 23.96  | <0.01 | 20.50       | <0.01 |
| Galactaric acid          | 10.50  | 0.03  | 115.80 | <0.01 | 6.30        | 0.01  |
| 2-Hydroxyisocaproic acid | 10.33  | 0.03  | 10.33  | <0.01 | 10.33       | <0.01 |
| Fumaric acid             | 8.47   | 0.05  | 94.81  | <0.01 | 13.43       | <0.01 |
| Benzene, 4-chlorobutyl-  | 8.43   | 0.05  | 1.71   | 0.20  | 7.73        | <0.01 |
| Lanthionine              | 7.45   | 0.07  | 6.31   | <0.01 | 1.42        | 0.41  |

|                                                                           |      |      |        |       |       |       |
|---------------------------------------------------------------------------|------|------|--------|-------|-------|-------|
| <b>Phosphonoacetic Acid</b>                                               | 7.15 | 0.08 | 26.53  | <0.01 | 45.91 | <0.01 |
| <b>Lyxose, linear form</b>                                                | 7.04 | 0.08 | 3.21   | 0.04  | 3.83  | 0.05  |
| <b>Methyl 3,4-dimethoxyphenylhydroxyacetate</b>                           | 6.74 | 0.09 | 6.74   | <0.01 | 6.74  | 0.01  |
| <b>Caffeic acid</b>                                                       | 6.58 | 0.09 | 23.93  | <0.01 | 5.34  | 0.02  |
| <b>Phenylethanolamine</b>                                                 | 6.49 | 0.09 | 13.26  | <0.01 | 6.12  | 0.01  |
| <b>Threonic acid</b>                                                      | 6.31 | 0.09 | 8.04   | <0.01 | 1.42  | 0.41  |
| <b>Glutamine</b>                                                          | 6.07 | 0.10 | 22.59  | <0.01 | 0.66  | 0.81  |
| <b>3-Deoxy-arabino-hexaric acid</b>                                       | 5.64 | 0.11 | 5.64   | <0.01 | 5.64  | 0.02  |
| <b>Proline</b>                                                            | 5.64 | 0.11 | 31.28  | <0.01 | 1.69  | 0.33  |
| <b>4-Hydroxyhippuric acid</b>                                             | 5.56 | 0.11 | 5.56   | 0.01  | 5.56  | 0.02  |
| <b>D-Xylose</b>                                                           | 5.49 | 0.11 | 5.49   | 0.01  | 5.49  | 0.02  |
| <b>2,4,4-Trimethyl-1-pentanol</b>                                         | 5.34 | 0.11 | 5.34   | 0.01  | 5.34  | 0.02  |
| <b>d-Proline, N-methoxycarbonyl-, methyl ester</b>                        | 5.34 | 0.11 | 5.34   | 0.01  | 5.34  | 0.02  |
| <b>Bis2-ethylhexylamine</b>                                               | 5.32 | 0.11 | 5.32   | 0.01  | 5.32  | 0.02  |
| <b>2-(4-(2-Hydroxy-3-(isopropylamino)-propoxy)phenyl)acetonitrile</b>     | 5.22 | 0.11 | 5.22   | 0.01  | 5.22  | 0.02  |
| <b>Ethylamine, 2-((p-bromo-à-methyl-à-phenylbenzyl)oxy)-N,N-dimethyl-</b> | 5.14 | 0.11 | 5.14   | 0.01  | 5.14  | 0.02  |
| <b>2-O-Glycerol-alpha-d-galactopyranoside</b>                             | 5.10 | 0.11 | 5.10   | 0.01  | 5.10  | 0.02  |
| <b>4-Hydroxybenzoic acid</b>                                              | 5.08 | 0.11 | 122.41 | <0.01 | 1.96  | 0.26  |
| <b>D-Gluconic acid, delta-lactone</b>                                     | 4.98 | 0.11 | 4.98   | 0.01  | 4.98  | 0.02  |
| <b>Aucubin</b>                                                            | 4.91 | 0.11 | 12.16  | <0.01 | 0.22  | 1.00  |
| <b>Trifluoroacetamide</b>                                                 | 4.90 | 0.11 | 4.90   | 0.01  | 4.90  | 0.02  |
| <b>Hydracrylic acid</b>                                                   | 4.89 | 0.11 | 4.89   | 0.01  | 4.89  | 0.02  |
| <b>Timonacic</b>                                                          | 4.84 | 0.11 | 4.84   | 0.01  | 4.84  | 0.02  |
| <b>3-Octen-2-ol, E-</b>                                                   | 4.72 | 0.11 | 19.70  | <0.01 | 9.51  | <0.01 |
| <b>Lauric acid</b>                                                        | 4.63 | 0.11 | 4.63   | 0.01  | 4.63  | 0.02  |
| <b>Glyceryl-glycoside TMS ether</b>                                       | 4.60 | 0.11 | 4.60   | 0.01  | 4.60  | 0.02  |
| <b>Oxalic acid</b>                                                        | 4.45 | 0.12 | 169.11 | <0.01 | 3.32  | 0.07  |
| <b>D-Mannopyranose</b>                                                    | 4.24 | 0.13 | 4.24   | 0.02  | 4.24  | 0.03  |
| <b>alpha-D-glucose</b>                                                    | 4.11 | 0.14 | 10.21  | <0.01 | 0.49  | 0.86  |
| <b>Xylitol</b>                                                            | 4.07 | 0.14 | 60.84  | <0.01 | 4.43  | 0.03  |
| <b>Pentanedioic acid</b>                                                  | 3.98 | 0.14 | 59.34  | <0.01 | 3.98  | 0.04  |
| <b>3,4-Dimethoxymandelic acid</b>                                         | 3.67 | 0.16 | 3.67   | 0.03  | 3.67  | 0.05  |
| <b>D---Fructofuranose, pentakistrimethylsilyl ether</b>                   | 3.61 | 0.16 | 3.61   | 0.03  | 3.61  | 0.06  |
| <b>Alanine, N-methyl-N-ethoxycarbonyl-, dodecyl ester</b>                 | 3.51 | 0.17 | 18.39  | <0.01 | 33.27 | <0.01 |
| <b>Undecyl 2- [butoxycarbony(methyl)amino]propanoate</b>                  | 3.30 | 0.18 | 7.29   | <0.01 | 1.29  | 0.46  |
| <b>Lactic acid</b>                                                        | 3.28 | 0.18 | 16.39  | <0.01 | 18.71 | <0.01 |
| <b>1-Aminocyclopentanecarboxylic acid</b>                                 | 3.19 | 0.19 | 3.19   | 0.04  | 3.19  | 0.08  |
| <b>L-Aspartic acid</b>                                                    | 3.00 | 0.20 | 21.47  | <0.01 | 0.22  | 1.00  |
| <b>Levulinic acid enol</b>                                                | 2.96 | 0.20 | 104.76 | <0.01 | 5.76  | 0.01  |
| <b>Inositol 1-phosphate</b>                                               | 2.84 | 0.21 | 9.99   | <0.01 | 3.08  | 0.09  |
| <b>Cadaverine</b>                                                         | 2.84 | 0.21 | 5.00   | 0.01  | 1.73  | 0.33  |
| <b>Glyceric acid</b>                                                      | 2.62 | 0.24 | 10.33  | <0.01 | 1.96  | 0.26  |

|                                                            |      |      |        |       |       |       |
|------------------------------------------------------------|------|------|--------|-------|-------|-------|
| Urea                                                       | 2.41 | 0.26 | 14.40  | <0.01 | 0.49  | 0.86  |
| L-5-Oxoproline                                             | 2.27 | 0.28 | 17.00  | <0.01 | 0.39  | 0.92  |
| Sorbic acid                                                | 2.24 | 0.28 | 155.37 | <0.01 | 2.24  | 0.20  |
| 2-Isopropylaminoethanol                                    | 2.09 | 0.30 | 18.29  | <0.01 | 13.34 | <0.01 |
| 7,9-Di-tert-butyl-1-oxaspiro4,5deca-6,9-diene-2,8-dione    | 2.01 | 0.31 | 19.72  | <0.01 | 3.81  | 0.05  |
| L--Tartaric acid                                           | 1.94 | 0.31 | 55.28  | <0.01 | 1.94  | 0.26  |
| L-Threonine                                                | 1.93 | 0.31 | 9.18   | <0.01 | 0.03  | 1.00  |
| Tridecanoic acid                                           | 1.83 | 0.33 | 7.29   | <0.01 | 1.52  | 0.39  |
| b-Aminoisobutyric acid                                     | 1.80 | 0.33 | 9.42   | <0.01 | 3.19  | 0.08  |
| 4-Methoxycarbonylphenol                                    | 1.50 | 0.40 | 145.70 | <0.01 | 1.50  | 0.39  |
| Pinitol                                                    | 1.46 | 0.40 | 147.40 | <0.01 | 1.46  | 0.40  |
| Formamide                                                  | 1.41 | 0.41 | 15.23  | <0.01 | 0.36  | 0.93  |
| Adrenaline                                                 | 1.33 | 0.42 | 1.24   | 0.33  | 4.12  | 0.04  |
| Citric acid                                                | 1.25 | 0.44 | 8.52   | <0.01 | 0.45  | 0.89  |
| L-Tryptophan                                               | 1.23 | 0.44 | 25.95  | <0.01 | 9.77  | <0.01 |
| Methionine                                                 | 1.21 | 0.44 | 10.77  | <0.01 | 0.40  | 0.92  |
| Ethyl .alpha.-D-glucopyranoside                            | 1.12 | 0.46 | 7.08   | <0.01 | 1.73  | 0.33  |
| alpha-D-Talopyranose                                       | 1.05 | 0.49 | 9.28   | <0.01 | 2.18  | 0.21  |
| Cysteine                                                   | 0.96 | 0.51 | 6.43   | <0.01 | 2.90  | 0.11  |
| Inositol                                                   | 0.93 | 0.51 | 11.02  | <0.01 | 4.47  | 0.03  |
| Phenylalanine                                              | 0.79 | 0.55 | 4.86   | 0.01  | 0.04  | 1.00  |
| D-Glucuronic acid                                          | 0.75 | 0.56 | 8.30   | <0.01 | 1.14  | 0.53  |
| Formylpiperidine                                           | 0.74 | 0.56 | 18.18  | <0.01 | 5.28  | 0.02  |
| Gluconic acid                                              | 0.67 | 0.58 | 15.41  | <0.01 | 0.67  | 0.81  |
| Putrescine                                                 | 0.67 | 0.58 | 164.10 | <0.01 | 0.79  | 0.72  |
| L-Rhamnose                                                 | 0.60 | 0.59 | 157.39 | <0.01 | 0.60  | 0.83  |
| 3-Methylpiperazine-2,5-dione                               | 0.52 | 0.63 | 247.03 | <0.01 | 0.52  | 0.86  |
| Linoleic acid                                              | 0.35 | 0.72 | 15.56  | <0.01 | 0.57  | 0.85  |
| Valine                                                     | 0.34 | 0.73 | 5.54   | 0.01  | 0.61  | 0.83  |
| Ritalinic acid                                             | 0.29 | 0.76 | 7.75   | <0.01 | 0.29  | 0.98  |
| Asparagine                                                 | 0.25 | 0.78 | 11.89  | <0.01 | 1.00  | 0.59  |
| Glucopyranoside                                            | 0.23 | 0.78 | 28.63  | <0.01 | 0.23  | 1.00  |
| 2,5-Dimethoxymandelic acid                                 | 0.22 | 0.78 | 3.12   | 0.05  | 0.13  | 1.00  |
| 2-3-Bromo-5,5,5-trichloro-2,2-dimethylpentyl-1,3-dioxolane | 0.21 | 0.78 | 3.45   | 0.03  | 6.69  | 0.01  |
| D--Galactopyranose, pentakistrimethylsilyl ether           | 0.15 | 0.83 | 11.46  | <0.01 | 0.15  | 1.00  |
| Salicylic acid                                             | 0.14 | 0.83 | 40.60  | <0.01 | 0.14  | 1.00  |
| Pipecolic acid                                             | 0.09 | 0.89 | 35.56  | <0.01 | 0.09  | 1.00  |
| Methyl glycoside                                           | 0.08 | 0.89 | 6.91   | <0.01 | 8.00  | <0.01 |
| Aminomalonic acid                                          | 0.08 | 0.89 | 16.51  | <0.01 | 0.08  | 1.00  |
| Linolenic acid                                             | 0.07 | 0.89 | 13.44  | <0.01 | 1.05  | 0.56  |
| Ornithine                                                  | 0.04 | 0.93 | 4.81   | 0.01  | 1.52  | 0.39  |
| 5-Methyluridine                                            | 0.04 | 0.93 | 135.55 | <0.01 | 0.04  | 1.00  |
| B-Alanine                                                  | 0.03 | 0.95 | 3.81   | 0.02  | 2.80  | 0.11  |

|                                           |       |      |        |       |       |      |
|-------------------------------------------|-------|------|--------|-------|-------|------|
| <b>Tris(trimethyl)siloxyethylene</b>      | 0.02  | 0.97 | 55.79  | <0.01 | 0.02  | 1.00 |
| <b>Elaidic acid</b>                       | 0.01  | 0.98 | 93.77  | <0.01 | 0.01  | 1.00 |
| <b>Serine</b>                             | 0.01  | 0.98 | 10.86  | <0.01 | 0.05  | 1.00 |
| <b>1-Propene-1,2,3-tricarboxylic acid</b> | <0.01 | 1.00 | 562.08 | <0.01 | <0.01 | 1.00 |
| <b>Malic acid</b>                         | <0.01 | 1.00 | 11.09  | <0.01 | 0.23  | 1.00 |
| <b>Alanylglycine</b>                      | <0.01 | 1.00 | 127.33 | <0.01 | <0.01 | 1.00 |
| <b>L-Lysine</b>                           | <0.01 | 1.00 | 30.24  | <0.01 | 4.85  | 0.02 |
| <b>Palmitoleic acid</b>                   | <0.01 | 1.00 | 23.00  | <0.01 | <0.01 | 1.00 |

250  
251

252 In the heatmap, we also see two major clusters: one composed of metabolites mostly present in the gut of  
253 the larvae fed on the artificial diet (Fig. 3A) and another cluster composed of metabolites present in the  
254 larvae fed on the natural diets (Fig. 3B).

255 Within the first cluster (Fig. 3A), there are four other sub clusters: one where the metabolites are similarly  
256 abundant in both strains, two sub clusters where the differences between strains are most evident, being one  
257 sub cluster composed of metabolites more abundant in *RS* and the second sub cluster composed of  
258 metabolites more abundant in *CS*; Finally, there is a sub cluster where besides the metabolites were abundant  
259 in larvae fed on artificial diet, the metabolites were also abundant in the midgut of caterpillars fed on rice  
260 and cotton (Fig. 3A).

261 Whereas, in the second large cluster (Fig. 3B), we highlighted five sub-clusters: one in which the gut  
262 metabolomic profile was associated with *CS* when feeding on rice, another in which the profile was similar  
263 among the strains feeding on rice, the next was characterized by similar abundance among all plants, and  
264 the last two sub-clusters were characterized by metabolites associated with cotton and corn plants,  
265 respectively (Fig. 3B).

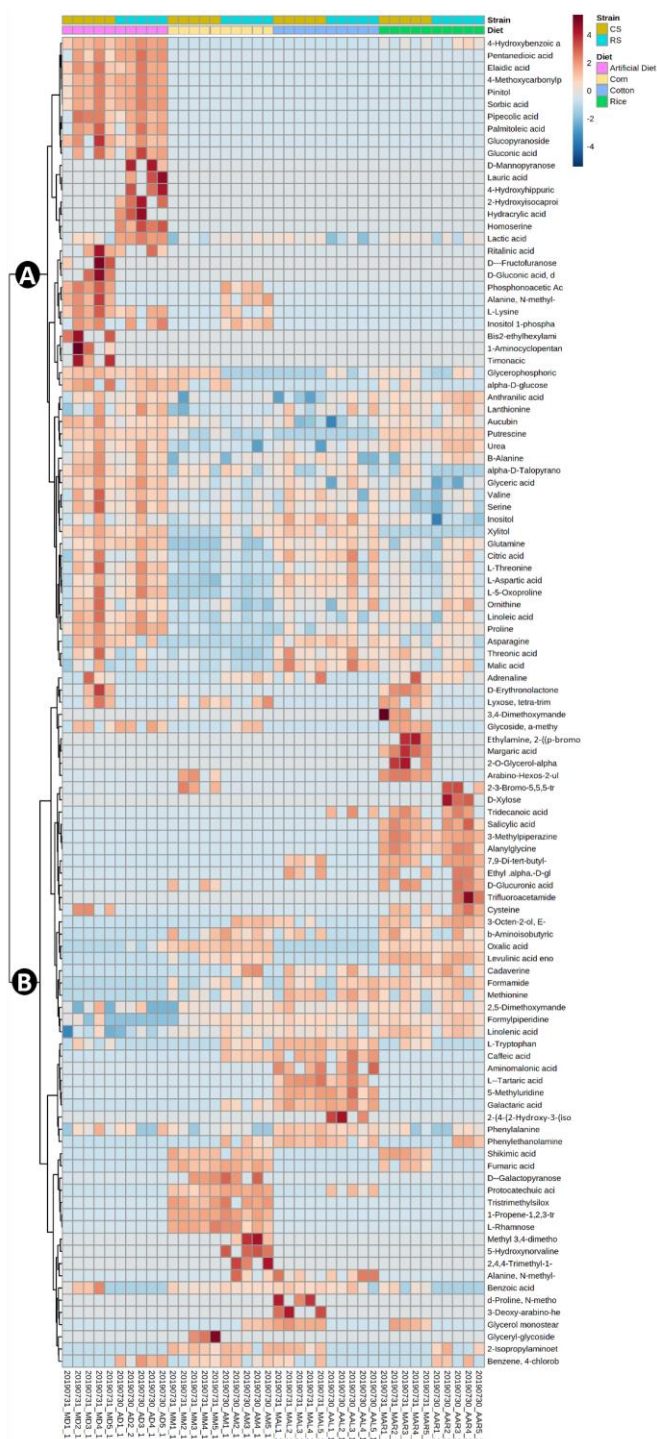

266  
 267 **Figure 3.** Heatmap of midgut metabolites from corn and rice strains of *Spodoptera frugiperda* larvae  
 268 after feeding on artificial diet, corn, cotton, or rice. The experimental groups were rice strain on rice (RiRS),  
 269 corn (CoRS), cotton (CtRS) and artificial diet (DiRS) and corn strain on the same diets (RiCS, CoCS, CtCS  
 270 and DiCS).  
 271



272 Pairwise analyses of the *RS* and *CS* gut metabolomes of larvae fed on each food source led to the  
 273 identification of metabolites that differentiate FAW strains (Table 2). *RS* fed on corn had a higher  
 274 abundance of caffeic acid, inositol 1-phosphate, an unidentified biogenic amine, protocatechuic acid, 5-  
 275 hydroxynorvaline and 3-octen-2-ol, (E)- than the *CS* larvae. Only the abundance of glycerophosphoric acid  
 276 was higher in *CS* than in *RS* larvae (Table 2). In cotton, the abundances of glycerol monostearate and 2-  
 277 isopropylaminoethanol were higher in *CS* than in *RS* larvae. In rice-fed larvae, *CS* larvae had higher levels  
 278 of shikimic acid, 2-ketoglucose, D-erythronolactone and margaric acid, while *RS* had higher anthranilic  
 279 acid. The midgut of *RS* larvae fed on artificial diet were characterized by higher phosphonoacetic acid and  
 280 alanine, N-methyl-N-ethoxycarbonyl-, dodecyl ester than in *RS*, while homoserine, lactic acid, and 4-  
 281 chlorobutyl-benzene were more abundant in the midgut of *CS* larvae (Table 2).

282 **Table 2.** Significant features of midgut metabolome of *Spodoptera frugiperda* strains (*CS* vs *RS*) larvae  
 283 after feeding on different food sources identified by Volcano plot with fold change threshold 2 and t-tests.  
 284 False discovery rate correction was applied to adjust the p-values ( $p \leq 0.05$ ) and the strain where the  
 285 compound were more abundant is identified.

|                                                                                                      | Metabolite                  | FC    | log2(FC) | FDR  | -log10(p) | Sf Strain |
|------------------------------------------------------------------------------------------------------|-----------------------------|-------|----------|------|-----------|-----------|
| <br><b>Corn</b>   | Caffeic acid                | 0.16  | -2.64    | 0.00 | 5.80      | <i>RS</i> |
|                                                                                                      | Glycerophosphoric acid      | 8.18  | 3.03     | 0.00 | 4.22      | <i>CS</i> |
|                                                                                                      | Inositol 1-phosphate        | 0.04  | -4.55    | 0.00 | 2.62      | <i>RS</i> |
|                                                                                                      | Unidentified biogenic amine | 0.04  | -4.51    | 0.03 | 1.55      | <i>RS</i> |
|                                                                                                      | Protocatechuic acid         | 0.11  | -3.15    | 0.03 | 1.55      | <i>RS</i> |
|                                                                                                      | 5-Hydroxynorvaline          | 0.20  | -2.34    | 0.05 | 1.26      | <i>RS</i> |
|                                                                                                      | 3-Octen-2-ol, (E)-          | 5.19  | -2.38    | 0.05 | 1.26      | <i>RS</i> |
| <br><b>Cotton</b> | Glycerol monostearate       | 6.35  | 2.67     | 0.00 | 4.78      | <i>CS</i> |
|                                                                                                      | 2-Isopropylaminoethanol     | 22.24 | 4.48     | 0.00 | 3.05      | <i>CS</i> |
|                                                                                                      | Anthranilic acid            | 0.07  | -3.78    | 0.05 | 1.30      | <i>RS</i> |
|                                                                                                      | Lactic acid                 | 8.76  | 3.13     | 0.05 | 1.30      | <i>CS</i> |
| <br><b>Rice</b>   | Shikimic acid               | 9.28  | 3.21     | 0.00 | 3.84      | <i>CS</i> |
|                                                                                                      | 2-ketoglucose               | 8.68  | 3.12     | 0.00 | 3.50      | <i>CS</i> |
|                                                                                                      | D-Erythronolactone          | 23.03 | 4.53     | 0.00 | 2.63      | <i>CS</i> |
|                                                                                                      | Margaric acid               | 20.90 | 4.39     | 0.00 | 2.63      | <i>CS</i> |
|                                                                                                      | Anthranilic acid            | 0.29  | -1.79    | 0.03 | 1.59      | <i>RS</i> |
|                                                                                                      | Glycerol monostearate       | 8.05  | 3.01     | 0.05 | 1.28      | <i>CS</i> |
|                                                                                                      | Fumaric acid                | 7.48  | 2.90     | 0.05 | 1.28      | <i>CS</i> |
|                                                                                                      | Benzoic acid                | 6.71  | 2.75     | 0.05 | 1.28      | <i>CS</i> |
|                                                                                                      | Methyl Glycoside            | 6.09  | 2.61     | 0.05 | 1.28      | <i>CS</i> |
|                                                                                                      | Lyxose, Linear form         | 11.18 | 3.48     | 0.05 | 1.26      | <i>CS</i> |



|                                                                                                                 |                                                   |        |       |      |      |    |
|-----------------------------------------------------------------------------------------------------------------|---------------------------------------------------|--------|-------|------|------|----|
| <b>Artificial<br/>Diet</b><br> | Homoserine                                        | 15.42  | 3.95  | 0.00 | 2.67 | CS |
|                                                                                                                 | Lactic acid                                       | 73.43  | 6.20  | 0.01 | 1.95 | CS |
|                                                                                                                 | Phosphonoacetic Acid                              | 0.03   | -4.94 | 0.01 | 1.95 | RS |
|                                                                                                                 | Benzene, 4-chlorobutyl-                           | 680.08 | 9.41  | 0.01 | 1.90 | CS |
|                                                                                                                 | Alanine, N-methyl-N-ethoxycarbonyl-,dodecyl ester | 0.06   | -3.99 | 0.01 | 1.89 | RS |
|                                                                                                                 |                                                   |        |       |      |      |    |

286

287

#### 288 4. DISCUSSION

289 The metabolic profile of the FAW larvae midgut is largely influenced by the food source used, and the  
290 two strains differ in every food source analyzed. Our data demonstrates the *RS* and *CS* interact differently  
291 with the substrate on which they are feeding, potentially due to differential metabolism of plant chemistry  
292 (Silva-Brandão et al., 2017). Differences at the genomic level are reported for these strains (Dumas et al.,  
293 2015), particularly with the large variation they have in the number of copies of genes and gene sequences  
294 encoding for detoxification and digestive enzymes (Gouin et al., 2017). In addition, our results are also  
295 consistent with the plethora of differences at the transcriptional level reported for the whole body of both  
296 strains when feeding on the same host plants. These strains were demonstrated to have differences in the  
297 expression levels of genes encoding for proteins with oxidoreductase activity, metal-ion binding, and  
298 hydrolase activity, which are also related to the metabolism of xenobiotics (Orsucci et al., 2020; Silva-  
299 Brandão et al., 2017).

300 Some compounds reported here in the FAW midgut have a defensive function in plants against insects,  
301 such as shikimic acid. This compound has been shown to reduce intestinal proteolytic activity in insects by  
302 acidifying the intestinal lumen. However, some specialist insects such as *Gilpinia hercyniae* (Hymenoptera)  
303 are able to metabolize and neutralize the effect of this compound, through their gut bacteria (Schopf, 1986).  
304 Therefore, the higher abundance of shikimic acid in the *CS* larval midgut comparing to *RS* feeding on rice  
305 indicates the *CS* has a lower capacity to  
306 process this metabolite. Additionally, the difference in shikimic acid metabolization may also be due to the  
307 differential activity of the gut microbiota of the strains, similar to the adaptation found in *G. hercyniae*

308 (Jensen, 1991). Likewise, margaric acid, or heptadecanoic acid, was shown to accumulate in *CS* when  
309 feeding on rice. This compound was negatively correlated with oviposition, eclosion, and nymphal survival  
310 of *Stephanitis pyrioides* (Hemiptera: Tingidae) on azalea (*Rhododendron sp.*), but positively correlated with  
311 duration of development, indicating an arrestment of the developmental period (Wang et al., 1999).  
312 Margaric acid is also found in rice plants (Jones et al. 2011) so it may play a role in the low performance  
313 and survival of *CS* on rice plants (Silva-Brandão et al., 2017).

314 The reverse pattern was observed for strains feeding on corn, where the defensive metabolites, 5-  
315 hydroxynorvaline, caffeic acid and protocatechuic acid, were measured in higher abundance in *RS* larval  
316 midgut than in *CS*. The accumulation of 5-hydroxynorvaline in maize leaves has been demonstrated after  
317 the feeding of *S. exigua* and the aphid, *Rhopalosiphum maidi* (Yan et al., 2015), suggesting that this  
318 metabolite can provide protection against herbivores. When this compound was added to the artificial diet,  
319 it reduced aphid growth and reproduction, but no significant effect was found on *S. exigua* larval growth.  
320 However, 5-hydroxynorvaline also plays a defensive role by replacing amino acids in protein synthesis or  
321 by inhibiting the biosynthetic pathways of many microorganisms (Guirard, 1958; Heremans and Jacobs,  
322 1994; Huang et al., 2011; Kurtin et al., 1971; Washtien et al., 1977). Thus, it is possible 5-hydroxynorvaline  
323 negatively impact the gut bacteria and impairs its contribution to the host.

324 The flavonoids caffeic and protocatechuic acids are referred as potential insecticides due to their toxic  
325 effects (War et al., 2013). *Helicoverpa armigera* larvae fed on caffeic and protocatechuic acids displayed  
326 reduced digestive and detoxification activity due to a reduction in serine protease, trypsin, and esterase  
327 activity. The larvae also showed greater reduction in larval weight and higher mortality when compared to  
328 the larvae fed on untreated control diet (War et al., 2013). Moreover, caffeic acid also increases the oxidative  
329 stress in the gut of insect herbivores due to the elevation of protein oxidation, lipid peroxidation products  
330 and release of free ions (Summers and Felton, 1994). The accumulation of these flavanoids in the *RS* larval  
331 midgut could explain why *RS* does not perform as well as the *CS* when feeding on maize (Orsucci et al.,  
332 2020; Silva-Brandão et al., 2017).

333

334 The lower levels of defensive plant compounds in the midgut of the strains when they were feeding on  
335 their preferred host plants (*RS* on and rice *CS* on maize) and their higher abundancies in the midgut when  
336 larvae were feeding on the non-preferred host plants (Fig. S1), suggest either differential metabolization of  
337 the food source as discussed above and/or differential elicitation of metabolic response in the host plant.  
338 Additionally, FAW strains were demonstrated inducing different defense responses in maize and Bermuda  
339 grass via specific differences in their saliva composition (Acevedo et al., 2018). The gut-associated  
340 microbes in their oral secretions also play a role mediating the insect-plant interaction by regulating plant  
341 defenses upon their secretion through insect oral secretions (Acevedo et al., 2017).

342 Our findings also suggest that the strains of FAW metabolize the artificial diet differently. The diet has  
343 been widely used for several Lepidoptera, including FAW, demonstrating good performance (Gardner et  
344 al., 1984; Perkins, 1979; Silva et al., 2018), However, most experiments were performed using the corn  
345 strain. There is only one study as far as we know showing that *CS* larvae were significantly heavier than *RS*  
346 larvae when they were fed the artificial diet (Silva-Brandão et al., 2017). Furthermore, artificial diets  
347 generally provide unrealistic amounts of soluble carbohydrates, proteins, and fats. Perhaps the reason for a  
348 greater accumulation of compounds in the larval gut when compared to other diets is due to the large amount  
349 of these compounds in the food, which does not allow their complete metabolization.

350 The fact that only glycerol monostearate and 2-isopropylaminoethanol were differentially abundant  
351 between *CS* and *RS* strains, being both more abundant in the midgut of *CS* larvae suggest that the strains  
352 behave in a very similar way when feeding on this plant. Interesting, it is suggested that feeding on dicot is  
353 a primitive condition of the FAW complex and feeding on grasses is a more recent event (Kergoat et al.,  
354 2012). Additionally, studies also demonstrated that FAW presents low performance and low survival rate  
355 when feeding on cotton (Ali et al., 1990; Barros et al., 2010)

356 In conclusion, our study documented the effects of host strains and dietary on the metabolome of the  
357 FAW midgut. Our analyses found not only diet effects on the metabolome but indicate differential digestive  
358 metabolism between FAW strains. and identified marker metabolites that may help us to better understand  
359 the mechanisms involved in host adaptation. Our results shed light on our understanding of metabolic

360 activities in the FAW, being a unit composed of its own metabolome and the metabolome of the associated  
361 gut microbiota. Further analyses are essential to reveal the links between gut microbiota composition and  
362 host metabolic phenotype, thus providing a holistic understanding of the functionality and adaptability of  
363 strains to host plants.

364

## 365 **5. ACKNOWLEDGEMENTS**

366 We are grateful to the technician at the Insect Interactions Laboratory, Marcele Coelho for  
367 her help in the rearing of *S. frugiperda* and the host plant management. We also thank the  
368 technicians of the multi-User Proteomics, Metabolomics and Lipidomics laboratory, Thais  
369 Cataldi and Monica Labate for their help with the gas chromatography and mass spectrometry  
370 analyses.

371

## 372 **6. FUNDING**

373 This work was supported by the São Paulo Research Foundation (FAPESP) [process  
374 2011/50877-0]; the Ministry of Science, Technology and Innovation (Conselho Nacional de  
375 Desenvolvimento Científico e Tecnológico – CNPq [process 462140-2014/8]; and the FAPESP  
376 for the PhD student fellowship [2017/24377-7] provided to the first author. This manuscript is  
377 one of the chapters of the PhD Dissertation of the first author.

378

## 379 **7. CONFLICTS OF INTEREST**

380 Authors declare they have no conflicts of interest or competing interests.

381

## 382 **8. REFERENCES**

- 383 Acevedo, F.E., Peiffer, M., Ray, S., Meagher, R., Luthe, D.S., Felton, G.W., 2018. Intraspecific  
384 differences in plant defense induction by fall armyworm strains. *New phytologist* 218, 310–321.
- 385 Acevedo, F.E., Peiffer, M., Tan, C.-W., Stanley, B.A., Stanley, A., Wang, J., Jones, A.G., Hoover, K.,  
386 Rosa, C., Luthe, D., 2017. Fall armyworm-associated gut bacteria modulate plant defense  
387 responses. *Molecular Plant-Microbe Interactions* 30, 127–137.
- 388 Ali, A., Luttrell, R.G., Pitre, H.N., 1990. Feeding sites and distribution of fall armyworm (Lepidoptera:  
389 Noctuidae) larvae on cotton. *Environmental Entomology* 19, 1060–1067.
- 390 Almeida, L.G. de, Moraes, L.A.B. de, Trigo, J.R., Omoto, C., Consoli, F.L., 2017. The gut microbiota  
391 of insecticide-resistant insects houses insecticide-degrading bacteria: A potential source for  
392 biotechnological exploitation. *PloS one* 12, e0174754.
- 393 Ayayee, P.A., Larsen, T., Rosa, C., Felton, G.W., Ferry, J.G., Hoover, K., 2016. Essential amino acid  
394 supplementation by gut microbes of a wood-feeding cerambycid. *Environmental Entomology* 45,  
395 66–73.
- 396 Barros, E.M., Torres, J.B., Bueno, A.F., 2010. Oviposição, desenvolvimento e reprodução de  
397 *Spodoptera frugiperda* (J.E. Smith) (Lepidoptera: Noctuidae) em diferentes hospedeiros de  
398 importância econômica. *Neotropical Entomology* 39, 996–1001.
- 399 Budzinski, I.G.F., de Moraes, F.E., Cataldi, T.R., Franceschini, L.M., Labate, C.A., 2019. Network  
400 analyses and data integration of proteomics and metabolomics from leaves of two contrasting  
401 varieties of sugarcane in response to drought. *Frontiers in Plant Science* 10, 1524.
- 402 Burton, R.L., Perkins, W.D., 1972. WSB, a new laboratory diet for the corn earworm and the fall  
403 armyworm. *Journal of Economic Entomology* 65, 385–386.
- 404 Ceja-Navarro, J.A., Vega, F.E., Karaoz, U., Hao, Z., Jenkins, S., Lim, H.C., Kosina, P., Infante, F.,  
405 Northen, T.R., Brodie, E.L., 2015. Gut microbiota mediate caffeine detoxification in the primary  
406 insect pest of coffee. *Nature communications* 6, 1–9.
- 407 Chen, B., Teh, B.-S., Sun, C., Hu, S., Lu, X., Boland, W., Shao, Y., 2016. Biodiversity and activity of  
408 the gut microbiota across the life history of the insect herbivore *Spodoptera littoralis*. *Scientific*  
409 *reports* 6, 1–14.
- 410 Chong, J., Wishart, D.S., Xia, J., 2019. Using MetaboAnalyst 4.0 for comprehensive and integrative  
411 metabolomics data analysis. *Current protocols in bioinformatics* 68, e86.
- 412 Dillon, R.J., Dillon, V.M., 2004. The gut bacteria of insects: nonpathogenic interactions. *Annual Reviews*  
413 *in Entomology* 49, 71–92.
- 414 Dillon, Rod J., Dillon, V.M., 2004. The gut bacteria of insects: nonpathogenic interactions. *Annual*  
415 *Reviews in Entomology* 49, 71–92.

- 416 Djamin, A., Pathak, M.D., 1967. Role of silica in resistance to Asiatic rice borer, *Chilo suppressalis*  
417 (Walker), in rice varieties. *Journal of Economic Entomology* 60, 347–351.
- 418 Dow, J.A.T., 1987. Insect midgut function. *Advances in insect physiology* 19, 187–328.
- 419 Drès, M., Mallet, J., 2002. Host races in plant–feeding insects and their importance in sympatric  
420 speciation. *Philosophical Transactions of the Royal Society of London. Series B: Biological*  
421 *Sciences* 357, 471–492.
- 422 Dumas, P., Legeai, F., Lemaitre, C., Scaon, E., Orsucci, M., Labadie, K., Gimenez, S., Clamens, A.-L.,  
423 Henri, H., Vavre, F., 2015. *Spodoptera frugiperda* (Lepidoptera: Noctuidae) host-plant variants:  
424 two host strains or two distinct species? *Genetica* 143, 305–316.
- 425 Engel, P., Moran, N.A., 2013. The gut microbiota of insects–diversity in structure and function. *FEMS*  
426 *microbiology reviews* 37, 699–735.
- 427 Gardner, W.A., Phillips, D. v, Smith, A.E., 1984. Effect of pinitol on the growth of *Heliothis zea* and  
428 *Trichoplusia ni* larvae. *Journal of Agricultural and Urban Entomology* 1, 101–105.
- 429 Goergen, G., Kumar, P.L., Sankung, S.B., Togola, A., Tamò, M., 2016. First report of outbreaks of the  
430 fall armyworm *Spodoptera frugiperda* (JE Smith)(Lepidoptera, Noctuidae), a new alien invasive  
431 pest in West and Central Africa. *PloS one* 11, e0165632.
- 432 Gouin, A., Bretaudeau, A., Nam, K., Gimenez, S., Aury, J.-M., Duvic, B., Hilliou, F., Durand, N.,  
433 Montagné, N., Darboux, I., 2017. Two genomes of highly polyphagous lepidopteran pests  
434 (*Spodoptera frugiperda*, Noctuidae) with different host-plant ranges. *Scientific reports* 7, 1–12.
- 435 Guirard, B.M., 1958. Microbial Nutrition. *Annual Review of Microbiology* 12, 247–278.  
436 <https://doi.org/10.1146/annurev.mi.12.100158.001335>
- 437 Hammer, T.J., Bowers, M.D., 2015. Gut microbes may facilitate insect herbivory of chemically  
438 defended plants. *Oecologia* 179, 1–14.
- 439 Heremans, B., Jacobs, M., 1994. Selection of *Arabidopsis thaliana* (L.) Heynh. mutants resistant to  
440 aspartate-derived amino acids and analogues. *Plant Science* 101, 151–162.
- 441 Hoffman, D.E., Jonsson, P.Ä.R., Bylesjö, M.A.X., Trygg, J., Antti, H., Eriksson, M.E., Moritz, T., 2010.  
442 Changes in diurnal patterns within the *Populus* transcriptome and metabolome in response to  
443 photoperiod variation. *Plant, Cell & Environment* 33, 1298–1313.  
444 <https://doi.org/https://doi.org/10.1111/j.1365-3040.2010.02148.x>
- 445 Huang, F., 2021. Resistance of the fall armyworm, *Spodoptera frugiperda*, to transgenic *Bacillus*  
446 *thuringiensis* Cry1F corn in the Americas: lessons and implications for Bt corn IRM in China.  
447 *Insect Science* 28, 574–589.

- 448 Huang, T., Jander, G., de Vos, M., 2011. Non-protein amino acids in plant defense against insect  
449 herbivores: representative cases and opportunities for further functional analysis. *Phytochemistry*  
450 72, 1531–1537.
- 451 Jakka, S.R.K., Gong, L., Hasler, J., Banerjee, R., Sheets, J.J., Narva, K., Blanco, C.A., Jurat-Fuentes,  
452 J.L., 2016. Field-evolved mode 1 resistance of the fall armyworm to transgenic Cry1Fa-expressing  
453 corn associated with reduced Cry1Fa toxin binding and midgut alkaline phosphatase expression.  
454 *Applied and environmental microbiology* 82, 1023–1034.
- 455 Jensen, T.S., 1991. Patterns of nutrient utilization in the needle-feeding guild. *Forest insect guilds:*  
456 *Patterns of interaction with host trees.* General Tech. Report NE 153, 134–143.
- 457 Johnson, S.J., 1987. Migration and the life history strategy of the fall armyworm, *Spodoptera frugiperda*  
458 in the western hemisphere. *International Journal of Tropical Insect Science* 8, 543–549.
- 459 Juárez, M.L., Schöfl, G., Vera, M.T., Vilardi, J.C., Murúa, M.G., Willink, E., Hänniger, S., Heckel,  
460 D.G., Groot, A.T., 2014. Population structure of *Spodoptera frugiperda* maize and rice host forms  
461 in South America: are they host strains? *Entomologia Experimentalis et Applicata* 152, 182–199.
- 462 Kasten Jr, P., Precetti, A.A.C.M., Parra, J.R.P., 1978. Dados biológicos comparativos de *Spodoptera*  
463 *frugiperda* (je smith, 1797) em duas dietas artificiais e substrato natural. *Brazilian journal of*  
464 *agriculture-Revista de Agricultura* 53, 68–78.
- 465 Kergoat, G.J., Goldstein, P.Z., le Ru, B., Meagher Jr, R.L., Zilli, A., Mitchell, A., Clamens, A.-L.,  
466 Gimenez, S., Barbut, J., Nègre, N., 2021. A novel reference dated phylogeny for the genus  
467 *Spodoptera* Guenée (Lepidoptera: Noctuidae: Noctuinae): new insights into the evolution of a pest-  
468 rich genus. *Molecular Phylogenetics and Evolution* 161, 107161.
- 469 Kergoat, G.J., Prowell, D.P., le Ru, B.P., Mitchell, A., Dumas, P., Clamens, A.-L., Condamine, F.L.,  
470 Silvain, J.-F., 2012. Disentangling dispersal, vicariance and adaptive radiation patterns: a case  
471 study using armyworms in the pest genus *Spodoptera* (Lepidoptera: Noctuidae). *Molecular*  
472 *Phylogenetics and Evolution* 65, 855–870.
- 473 Krishnan, S., Alden, N., Lee, K., 2015. Pathways and functions of gut microbiota metabolism impacting  
474 host physiology. *Current opinion in biotechnology* 36, 137–145.
- 475 Kurtin, W.E., Bishop, S.H., Himoe, A., 1971. Ornithine transcarbamylase: steady-state kinetic  
476 properties. *Biochemical and biophysical research communications* 45, 551–556.
- 477 Levy, H.C., Garcia-Maruniak, A., Maruniak, J.E., 2002. Strain identification of *Spodoptera frugiperda*  
478 (Lepidoptera: Noctuidae) insects and cell line: PCR-RFLP of cytochrome oxidase C subunit I gene.  
479 *Florida Entomologist* 85, 186–190.



- 480 Maag, D., Erb, M., Glauser, G., 2015. Metabolomics in plant–herbivore interactions: challenges and  
481 applications. *Entomologia Experimentalis et Applicata* 157, 18–29.  
482 [https://doi.org/https://doi.org/10.1111/eea.12336](https://doi.org/10.1111/eea.12336)
- 483 Mason, C.J., st. Clair, A., Peiffer, M., Gomez, E., Jones, A.G., Felton, G.W., Hoover, K., 2020. Diet  
484 influences proliferation and stability of gut bacterial populations in herbivorous lepidopteran  
485 larvae. *PLOS ONE* 15, e0229848-.
- 486 Meagher, R.L., Nagoshi, R.N., Stuhl, C.J., 2011. Oviposition choice of two fall armyworm (Lepidoptera:  
487 noctuidae) host strains. *Journal of Insect Behavior* 24, 337–347. [https://doi.org/10.1007/s10905-](https://doi.org/10.1007/s10905-011-9259-7)  
488 [011-9259-7](https://doi.org/10.1007/s10905-011-9259-7)
- 489 Montezano, D.G., Specht, A., Sosa-Gómez, D.R., Roque-Specht, V.F., Sousa-Silva, J.C., Paula-Moraes,  
490 S. v, Peterson, J.A., Hunt, T.E., 2018. Host Plants of *Spodoptera frugiperda* (Lepidoptera:  
491 Noctuidae) in the Americas. *African Entomology* 26, 286–300.  
492 <https://doi.org/10.4001/003.026.0286>
- 493 Orsucci, M., Moné, Y., Audiot, P., Gimenez, S., Nhim, S., Naït-Saïdi, R., Frayssinet, M., Dumont, G.,  
494 Boudon, J.-P., Vabre, M., Rialle, S., Koual, R., Kergoat, G.J., Nagoshi, R.N., Meagher, R.L.,  
495 d’Alençon, E., Nègre, N., 2020. Transcriptional differences between the two host strains of  
496 *Spodoptera frugiperda*; (Lepidoptera: Noctuidae). *bioRxiv* 263186.  
497 <https://doi.org/10.1101/263186>
- 498 Otim, M.H., Tay, W.T., Walsh, T.K., Kanyesigye, D., Adumo, S., Abongosi, J., Ochen, S., Sserumaga,  
499 J., Alibu, S., Abalo, G., Asea, G., Agona, A., 2018. Detection of sister-species in invasive  
500 populations of the fall armyworm *Spodoptera frugiperda* (Lepidoptera: Noctuidae) from Uganda.  
501 *PLOS ONE* 13, e0194571-.
- 502 Pashley, D.P., 1986. Host-associated Genetic Differentiation in Fall Armyworm (Lepidoptera:  
503 Noctuidae): a Sibling Species Complex? *Annals of the Entomological Society of America* 79, 898–  
504 904. <https://doi.org/10.1093/aesa/79.6.898>
- 505 Perkins, W.D., 1979. Laboratory Rearing of the Fall Armyworm. *The Florida Entomologist* 62, 87–91.  
506 <https://doi.org/10.2307/3494084>
- 507 Piggott, M.P., Tadle, F.P.J., Patel, S., Cardenas Gomez, K., Thistleton, B., 2021. Corn-strain or rice-  
508 strain? Detection of fall armyworm, *Spodoptera frugiperda* (JE Smith) (Lepidoptera: Noctuidae),  
509 in northern Australia. *International Journal of Tropical Insect Science*.  
510 <https://doi.org/10.1007/s42690-021-00441-7>
- 511 Pogue, M.G., 2002. A world revision of the genus *Spodoptera* Guenée:(Lepidoptera: Noctuidae).
- 512 Prowell, D.P., McMichael, M., Silvain, J.-F., 2004. Multilocus Genetic Analysis of Host Use,  
513 Introgression, and Speciation in Host Strains of Fall Armyworm (Lepidoptera: Noctuidae). *Annals*



- 514 of the Entomological Society of America 97, 1034–1044. <https://doi.org/10.1603/0013->  
515 8746(2004)097[1034:MGAOHU]2.0.CO;2
- 516 Salem, H., Bauer, E., Strauss, A.S., Vogel, H., Marz, M., Kaltenpoth, M., 2014. Vitamin  
517 supplementation by gut symbionts ensures metabolic homeostasis in an insect host. *Proceedings.*  
518 *Biological sciences* 281, 20141838. <https://doi.org/10.1098/rspb.2014.1838>
- 519 Sambrook, J., Russell, D.W., 2001. *Molecular Cloning: A Laboratory Manual*. Cold Spring Harbor  
520 Laboratory Press.
- 521 Sarr, O.M., Garba, M., Bal, A.B., Hima, K., Ndiaye, M., Fossoud, A., Clamens, A.-L., Tavoillot, J.,  
522 Gauthier, N., 2021. Strain composition and genetic diversity of the fall armyworm *Spodoptera*  
523 *frugiperda* (Lepidoptera, Noctuidae): new insights from seven countries in West Africa.  
524 *International Journal of Tropical Insect Science*. <https://doi.org/10.1007/s42690-021-00450-6>
- 525 Schopf, R., 1986. The effect of secondary needle compounds on the development of phytophagous  
526 insects. *Forest Ecology and Management* 15, 55–64. [https://doi.org/https://doi.org/10.1016/0378-](https://doi.org/10.1016/0378-)  
527 1127(86)90089-7
- 528 Sévin, D.C., Kuehne, A., Zamboni, N., Sauer, U., 2015. Biological insights through nontargeted  
529 metabolomics. *Current Opinion in Biotechnology* 34, 1–8.  
530 [https://doi.org/https://doi.org/10.1016/j.copbio.2014.10.001](https://doi.org/10.1016/j.copbio.2014.10.001)
- 531 Silva, A., Baronio, C., Galzer, E., Garcia, M., Botton, M., 2018. Development and reproduction of  
532 *Spodoptera eridania* on natural hosts and artificial diet. *Brazilian Journal of Biology* 79.  
533 <https://doi.org/10.1590/1519-6984.177219>
- 534 Silva-Brandão, K.L., Horikoshi, R.J., Bernardi, D., Omoto, C., Figueira, A., Brandão, M.M., 2017.  
535 Transcript expression plasticity as a response to alternative larval host plants in the speciation  
536 process of corn and rice strains of *Spodoptera frugiperda*. *BMC Genomics* 18, 792.  
537 <https://doi.org/10.1186/s12864-017-4170-z>
- 538 Singer, M., 2008. Evolutionary ecology of polyphagy, in: *specialization, speciation, and radiation: the*  
539 *evolutionary biology of herbivorous insects*. pp. 29–42.  
540 <https://doi.org/10.1525/california/9780520251328.003.0003>
- 541 Smith, C., 2005. Plant resistance to arthropods: molecular and conventional approaches, plant resistance  
542 to arthropods: molecular and conventional approaches. <https://doi.org/10.1007/1-4020-3702-3>
- 543 Suby, S.B., Soujanya, P.L., Yadava, P., Patil, J., Subaharan, K., Prasad, G.S., Babu, K.S., Jat, S.L.,  
544 Yathish, K.R., Vadassery, J., 2020. Invasion of fall armyworm (*Spodoptera frugiperda*) in India:  
545 nature, distribution, management and potential impact.
- 546 Summers, C.B., Felton, G.W., 1994. Prooxidant effects of phenolic acids on the generalist herbivore  
547 *Helicoverpa zea* (Lepidoptera: Noctuidae): Potential mode of action for phenolic compounds in

- 548 plant anti-herbivore chemistry. *Insect Biochemistry and Molecular Biology* 24, 943–953.  
549 [https://doi.org/10.1016/0965-1748\(94\)90023-X](https://doi.org/10.1016/0965-1748(94)90023-X)
- 550 Sun, Y. v, Hu, Y.-J., 2016. Integrative analysis of multi-omics data for discovery and functional studies  
551 of complex human diseases. *Advances in genetics* 93, 147–190.  
552 <https://doi.org/10.1016/bs.adgen.2015.11.004>
- 553 Wang, S., Wang, L., Fan, X., Yu, C., Feng, L., Yi, L., 2020. An insight into diversity and functionalities  
554 of gut microbiota in insects. *Current Microbiology* 77, 1976–1986.  
555 <https://doi.org/10.1007/s00284-020-02084-2>
- 556 Wang, Y., Braman, S.K., Robacker, C.D., Latimer, J.G., Espelie, K.E., 1999. Composition and  
557 variability of epicuticular lipids of azaleas and their relationship to azalea lace bug resistance.  
558 *Journal of the American Society for Horticultural Science* 124, 239–244.  
559 <https://doi.org/10.21273/JASHS.124.3.239>
- 560 War, A.R., Paulraj, M.G., Hussain, B., Buhroo, A.A., Ignacimuthu, S., Sharma, H.C., 2013. Effect of  
561 plant secondary metabolites on legume pod borer, *Helicoverpa armigera*. *Journal of Pest Science*  
562 86, 399–408. <https://doi.org/10.1007/s10340-013-0485-y>
- 563 Washtien, W., Cooper, A.J.L., Abeles, R.H., 1977. Substrate proton exchange catalyzed by  $\gamma$ -  
564 cystathionase. *Biochemistry* 16, 460–463.
- 565 Wongsiri, T., Randolph, N.M., 1962. A comparison of the biology of the sugarcane borer on artificial  
566 and natural diets. *Journal of Economic Entomology* 55, 472–473.
- 567 Wu, G.D., Compher, C., Chen, E.Z., Smith, S.A., Shah, R.D., Bittinger, K., Chehoud, C., Albenberg,  
568 L.G., Nessel, L., Gilroy, E., Star, J., Weljie, A.M., Flint, H.J., Metz, D.C., Bennett, M.J., Li, H.,  
569 Bushman, F.D., Lewis, J.D., 2016. Comparative metabolomics in vegans and omnivores reveal  
570 constraints on diet-dependent gut microbiota metabolite production. *Gut* 65, 63–72.  
571 <https://doi.org/10.1136/gutjnl-2014-308209>
- 572 Xia, J., Sinelnikov, I. v, Wishart, D.S., 2011. MetATT: a web-based metabolomics tool for analyzing  
573 time-series and two-factor datasets. *Bioinformatics (Oxford, England)* 27, 2455–2456.  
574 <https://doi.org/10.1093/bioinformatics/btr392>
- 575 Xia, X., Gurr, G.M., Vasseur, L., Zheng, D., Zhong, H., Qin, B., Lin, J., Wang, Y., Song, F., Li, Y., Lin,  
576 H., You, M., 2017. Metagenomic sequencing of diamondback moth gut microbiome unveils key  
577 holobiont adaptations for herbivory. *Frontiers in Microbiology* 8, 663.
- 578 Yan, J., Lipka, A.E., Schmelz, E.A., Buckler, E.S., Jander, G., 2015. Accumulation of 5-  
579 hydroxynorvaline in maize (*Zea mays*) leaves is induced by insect feeding and abiotic stress.  
580 *Journal of Experimental Botany* 66, 593–602. <https://doi.org/10.1093/jxb/eru385>

581 Yang, F.-Y., Saqib, H.S.A., Chen, J.-H., Ruan, Q.-Q., Vasseur, L., He, W.-Y., You, M.-S., 2020.  
582 Differential profiles of gut microbiota and metabolites associated with host shift of *Plutella*  
583 *xylostella*. International journal of molecular sciences 21, 6283.  
584 <https://doi.org/10.3390/ijms21176283>  
585 Yun, J.-H., Roh, S.W., Whon, T.W., Jung, M.-J., Kim, M.-S., Park, D.-S., Yoon, C., Nam, Y.-D., Kim,  
586 Y.-J., Choi, J.-H., Kim, J.-Y., Shin, N.-R., Kim, S.-H., Lee, W.-J., Bae, J.-W., 2014. Insect gut  
587 bacterial diversity determined by environmental habitat, diet, developmental stage, and phylogeny  
588 of host. Applied and environmental microbiology 80, 5254–5264.  
589 <https://doi.org/10.1128/aem.01226-14>  
590 Zhang, S., Shu, J., Xue, H., Zhang, W., Zhang, Y., Liu, Y., Fang, L., Wang, Y., Wang, H., 2020. The  
591 gut microbiota in *Camellia weevils* are influenced by plant secondary metabolites and contribute  
592 to saponin degradation. Msystems 5, e00692-19.  
593

## 594 9. SUPPLEMENTARY MATERIAL

595

596 A

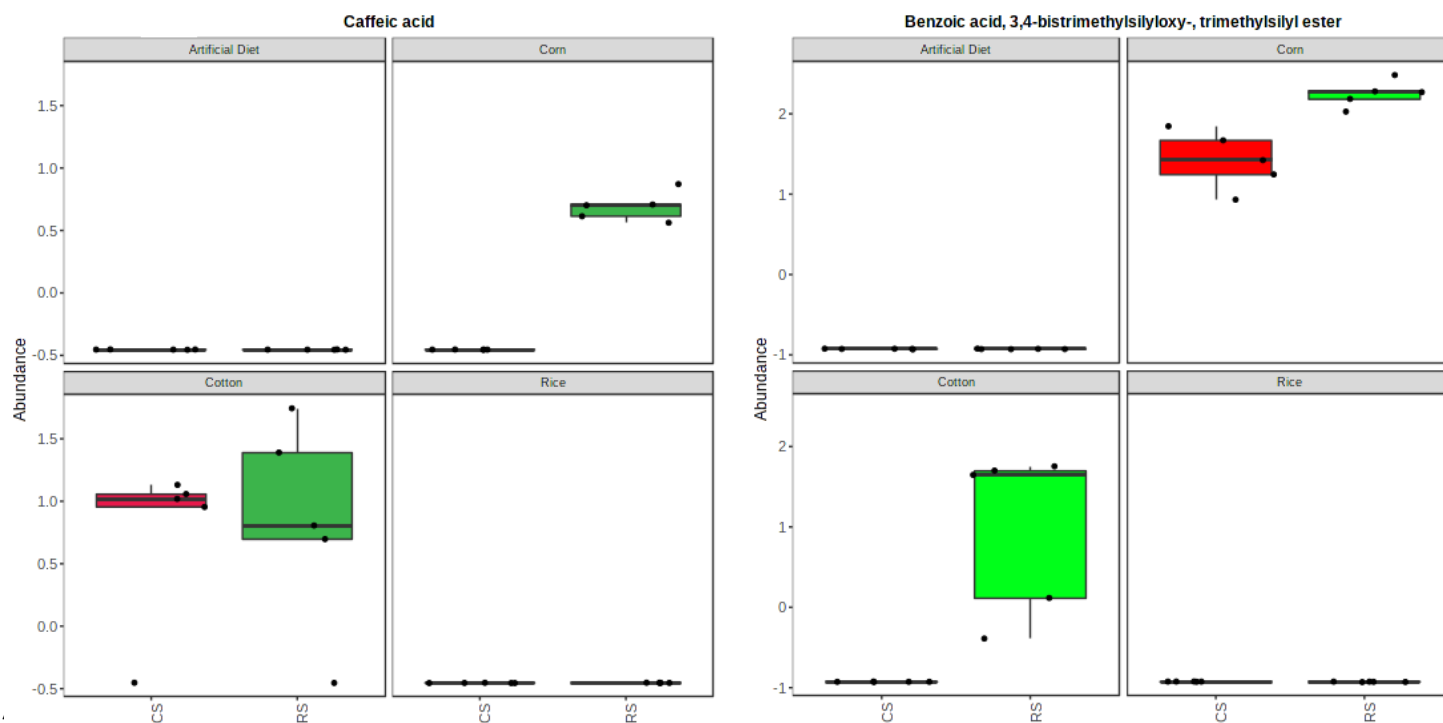

598

599

600

601

602

603

604

605

606

607

608

609

610

611

612

613

614

615 B

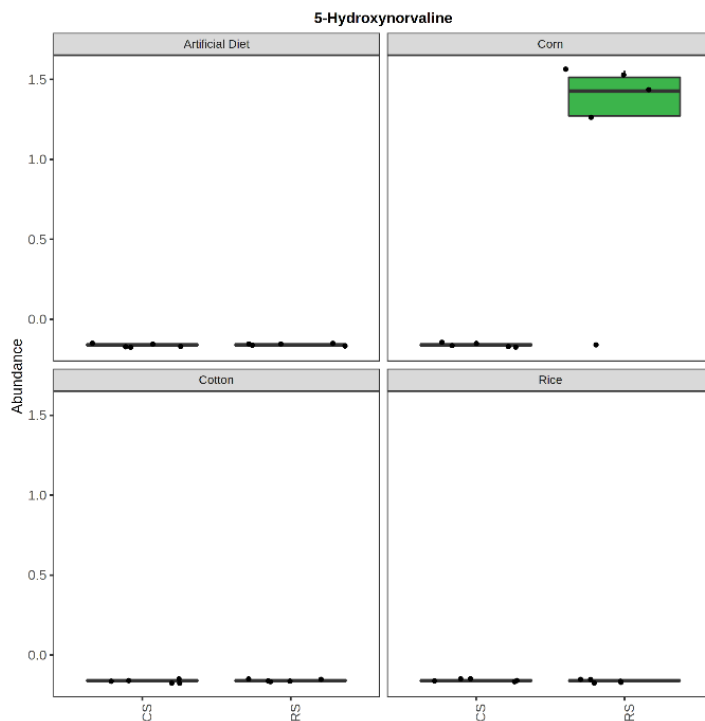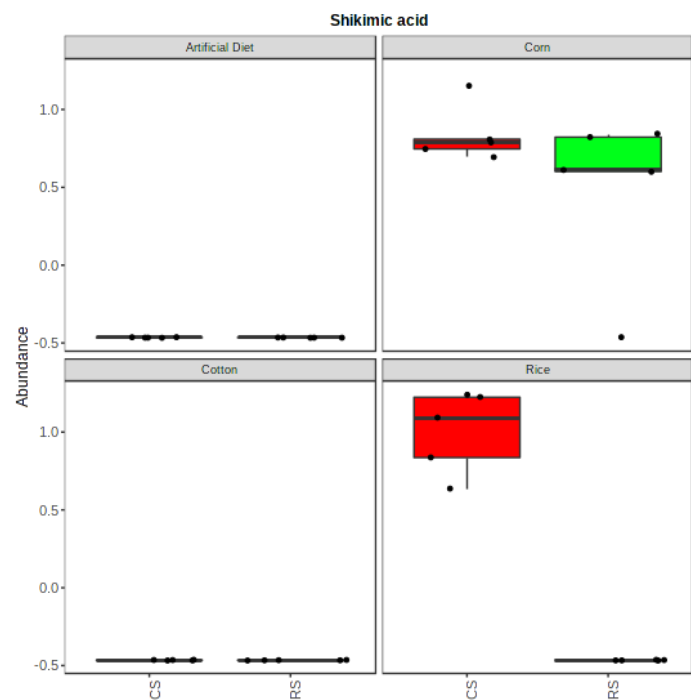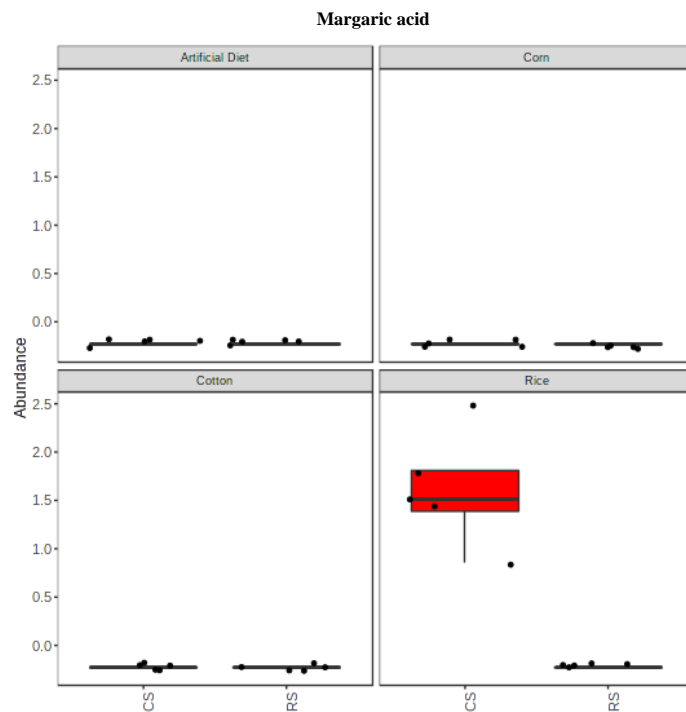

617 **Figure S1.** Boxplot of significant features of midgut metabolome of *Spodoptera frugiperda* strains larvae  
618 after feeding on maize (A) and rice (B) identified by Volcano plot with fold change threshold 2 and t-tests  
619 threshold 0.05. False discovery rate correction was applied to adjust the p-values (0.05).

620

621

622
